# Supplementary material for: Peroxisomes in brain development and function
Source: PubMed Central journal article supplement (PMC4880039; doi:10.1016/j.bbamcr.2015.12.005), 2015-12-11
Supplement: NIHMS68213-supplement-Transparency_document.pdf [file NIHMS68213-supplement-Transparency_document.pdf]

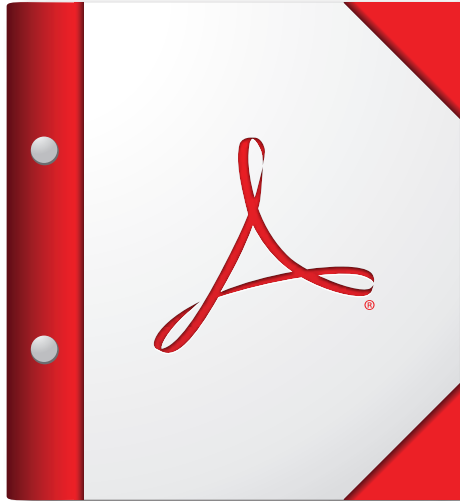

**For the best experience, open this PDF portfolio in  
Acrobat 9 or Adobe Reader 9, or later.**

[Get Adobe Reader Now!](#)
